# Supplementary material for: Dissection of major cancer gene variants in subsets of circulating tumor cells in advanced breast cancer
Source: PubMed Central journal article supplement (PMC6872745; doi:10.1038/s41598-019-53660-x), 2019-11-21
Supplement: 41598_2019_53660_MOESM1_ESM.pdf [file 41598_2019_53660_MOESM1_ESM.pdf]

# Dissection of major cancer gene variants in subsets of circulating tumor cells in advanced breast cancer

**Stella D'Oronzo<sup>1,2§</sup>, Domenica Lovero<sup>1§</sup>, Raffaele Palmirotta<sup>1</sup>, Luigia Stefania Stucci<sup>1</sup>, Marco Tucci<sup>1</sup>, Claudia Felici<sup>1</sup>, Eliano Cascardi<sup>3</sup>, Carmela Giardina<sup>3</sup>, Paola Cafforio<sup>1</sup>, and Franco Silvestris<sup>1\*</sup>**

<sup>1</sup>Department of Biomedical Sciences and Human Oncology – Section of Internal Medicine and Clinical Oncology

<sup>2</sup>I.R.C.C.S-Giovanni Paolo II Cancer Institute, 70124 Bari, Italy

<sup>3</sup>Department of Emergency and Organs Transplant, Division of Pathology, University of Bari Aldo Moro, P.zza G. Cesare, 11 - 70124 Bari, Italy.

<sup>§</sup>Both authors equally contributed to this work.

\*Correspondence: **Franco Silvestris** – [francesco.silvestris@uniba.it](mailto:francesco.silvestris@uniba.it)

Other e-mail addresses: Stella D'Oronzo – [stella.doronzo@uniba.it](mailto:stella.doronzo@uniba.it)

Domenica Lovero – [domenica.lovero@uniba.it](mailto:domenica.lovero@uniba.it)

Raffaele Palmirotta – [raffaelepalmirotta@gmail.com](mailto:raffaelepalmirotta@gmail.com)

Luigia Stefania Stucci - [stuccistefania@gmail.com](mailto:stuccistefania@gmail.com)

Marco Tucci - [marco.tucci@uniba.it](mailto:marco.tucci@uniba.it)

Claudia Felici – [claudiafelici85@live.it](mailto:claudiafelici85@live.it)

Eliano Cascardi – [eliano20@hotmail.it](mailto:eliano20@hotmail.it)

Carmela Giardina – [carmela.giardina@uniba.it](mailto:carmela.giardina@uniba.it)

Paola Cafforio – [paola.cafforio@uniba.it](mailto:paola.cafforio@uniba.it)

**Supplementary tables. Sequence variants in major driver genes identified in FFPE primary tumor samples and CTC subsets.**

Abbreviations: M+/E-: CTCs expressing only mesenchymal markers; M-/E-: CTCs which do not express both mesenchymal and epithelial markers; M+/E+: CTCs expressing both mesenchymal and epithelial markers; M-/E+: CTCs expressing only epithelial markers; ND: not detectable.

The sequence variants written in red represent pathogenic mutations, while those in orange are of a uncertain clinical significance. The red boxes indicate the presence of the sequence variant, the green boxes indicate the wild type status. For each sequence variant the allele frequency (%) is also reported.

| pt. #123 |                           |                     |                           |       |      |           |           |
|----------|---------------------------|---------------------|---------------------------|-------|------|-----------|-----------|
| GENE     | Nucleotide variant        | Amino acid mutation | COSMIC/dbSNP ID number    | gDNA  | FFPE | CTC M+/E+ | CTC M+/E- |
| APC      | c.4479G>A                 | p.T1493T            | COSM3760869               | 51.13 | 51.4 | 44.10     | 55.7      |
| APC      | c.4533C>T                 | p.Leu1511           | rs150089434               |       |      | 8.00      | 5.80      |
| AKT1     | c.480T>C                  | p.T160T             | -                         |       |      |           | 7.45      |
| AKT1     | c.543C>A                  | p.L181L             | -                         |       |      |           | 7.86      |
| AKT1     | c.474C>A                  | p.K159K             | -                         |       |      |           | 8.05      |
| AKT1     | c.486C>G                  | p.G162G             | -                         |       |      |           | 8.29      |
| ATM      | c.1023C>T                 | p.V341V             | rs35728619                |       | 24.8 |           | 11.3      |
| ATM      | c.7328G>A                 | p.R2443Q            | COSM20404                 |       | 25.5 |           | 12.3      |
| CDH1     | c.1043C>T                 | p.A348V             | -                         |       |      |           | 5.45      |
| CSF1R    | c.1841TG>GA               | p.?                 | rs386693509               | 28.00 | 27.5 | 38.93     | 39.7      |
| EGFR     | c.2361G>A                 | p.Q787Q             | COSM1451600               | 99.45 | 99.6 | 69.47     | 99.6      |
| ERBB2    | c.2638G>A                 | p.D880N             | COSM7002319               |       |      |           | 5.32      |
| ERBB4    | c.421+58A>G               | p.?                 | rs839541                  |       |      | 32.72     |           |
| ERBB4    | c.729C>T                  | p.D243D             | rs755321591               | 52.48 | 44.7 | 29.09     | 46.7      |
| FBXW7    | c.1737G>A                 | p.G580G             | -                         |       |      |           | 6.00      |
| FBXW7    | c.1776T>C                 | p.N593N             | -                         |       |      |           | 6.01      |
| FBXW7    | c.1716T>C                 | p.N572N             | -                         |       |      |           | 6.05      |
| FGFR2    | c.1654G>A                 | p.G552R             | -                         |       |      |           | 5.85      |
| FGFR3    | c.1953G>A                 | p.T651T             | rs7688609                 | 99.58 | 99.6 | 99.81     | 99.7      |
| FLT3     | c.1310-3T>C               | p.?                 | rs2491231                 | 48.08 | 50.3 | 60.53     | 55.8      |
| GNA11    | c.606-10G>A               | p.?                 | -                         |       |      |           | 5.90      |
| HRA5     | c.81T>C                   | p.H27H              | COSM249860                | 86.22 | 98.5 | 60.16     | 99.7      |
| IDH2     | c.483C>T                  | p.V161V             | -                         |       |      |           | 5.75      |
| IDH2     | c.477C>T                  | p.R159R             | -                         |       |      |           | 7.05      |
| KDR      | c.798+54G>A               | p.?                 | rs7692791                 | 36.89 | 34.0 | 60.86     | 42.7      |
| KDR      | c.3849-24C>A              | p.?                 | rs10006115                |       |      | 9.85      |           |
| KDR      | c.2679T>G                 | p.G893G             | -                         |       |      | 5.00      | 5.33      |
| KIT      | c.2538C>T                 | p.K786K             | -                         |       |      | 6.50      |           |
| MET      | c.2962C>T                 | p.R988C             | COSM1666978<br>rs34589476 | 46.34 | 50.1 | 40.18     | 43.0      |
| NOTCH1   | c.4768T>C                 | p.F1590L            | -                         |       |      |           | 5.04      |
| NOTCH1   | c.4702A>C                 | p.R1568R            | -                         |       |      |           | 5.13      |
| NRAS     | c.51C>T                   | p.S17S              | -                         |       |      | 5.35      |           |
| PDGFRA   | c.1701A>G                 | p.P567P             | rs1873778                 | 100   | 99.8 | 100       | 99.9      |
| PDGFRA   | c.2472C>T                 | p.V824V             | COSM22413                 | 48.27 | 50.6 | 32.82     | 56.6      |
| PIK3CA   | c.352+40A>G               | p.?                 | rs3729674                 |       |      | 9.35      |           |
| PIK3CA   | c.1624G>C                 | p.E542Q             | COSM17442                 |       | 27.4 |           |           |
| PIK3CA   | c.3145G>C                 | p.G1049R            | COSM12597                 |       | 31.6 |           |           |
| PIK3CA   | c.3270G>A                 | p.?                 | rs183721599               |       |      | 7.06      |           |
| PIK3CA   | c.3141T>C                 | p.H1047H            | -                         |       |      | 6.35      |           |
| PIK3CA   | c.3081C>T                 | p.A1027A            | -                         |       |      | 6.00      |           |
| PIK3CA   | c.3054C>T                 | 3'UTR               | -                         |       |      | 6.30      |           |
| PIK3CA   | c.3282C>T                 | 3'UTR               | -                         |       |      | 6.50      |           |
| PIK3CA   | c.3266C>G                 | 3'UTR               | -                         |       |      | 6.60      |           |
| PIK3CA   | c.3245C>T                 | 3'UTR               | -                         |       |      | 6.85      |           |
| RET      | c.2307G>T                 | p.L769L             | rs1800861                 | 100   | 99.0 | 90.23     | 99.9      |
| RET      | c.2712C>G                 | p.S904S             | rs1800836                 | 48.97 | 44.7 | 55.81     | 46.4      |
| SMAD4    | c.1335A>G                 | p. R445R            | -                         |       |      | 11.00     | 17.00     |
| SMAD4    | c.1389A>G                 | p.A463A             | -                         |       |      | 6.96      |           |
| SMAD4    | c.1410T>C                 | p.P470P             | -                         |       |      | 6.81      |           |
| SMAD4    | c.1332T>C                 | p.H444H             | -                         |       |      | 8.94      |           |
| SMAD4    | c.1059C>T                 | p.Y353Y             | rs863224400               |       |      |           | 11.3      |
| SMAD4    | c.1062G>A                 | p.V354V             | -                         |       |      |           | 11.35     |
| SMAD4    | c.512C>A                  | p.Ser171*           | COSM1151109               |       |      |           | 6.16      |
| SMAD4    | c.1089T>C                 | p.C363C             | -                         |       |      |           | 11.7      |
| SMAD4    | c.1035C>T                 | p.C345C             | -                         |       |      |           | 12.4      |
| SMAD4    | c.1002G>A                 | p.Q334Q             | rs773598775               |       |      |           | 12.5      |
| SMAD4    | c.990A>G                  | p.E330E             | -                         |       |      |           | 12.6      |
| SMARCB1  | c.1119-41G>A              | p.?                 | COSM1090                  |       |      | 30.60     |           |
| SMO      | c.1623G>A                 | p.T541T             | COSM1085436               |       |      | 25.40     | 34.5      |
| SMO      | c.1566G>A                 | p.L522L             | -                         |       |      | 25.78     | 32.8      |
| SMO      | c.1539G>C                 | p.P513P             | -                         |       |      | 19.06     | 33.1      |
| SMO      | c.1545T>C                 | p.L515L             | -                         |       |      | 26.16     | 33.9      |
| SMO      | c.1590_1591delCGG<br>nsTT | p.IA530_531IS       | -                         |       |      | 25.84     | 34.2      |
| STK11    | c.976C>A                  | p.P326T             | rs771632414               | 49.77 | 53.1 | 39.57     | 43.9      |
| STK11    | c.135C>T                  | p.L45L              | rs1362065365              |       |      |           | 5.35      |
| STK11    | c.174C>G                  | p.G58G              | rs756661578               |       |      | 5.65      | 5.35      |
| STK11    | c.171A>G                  | p.E57E              | rs1060503785              |       |      | 5.70      | 5.55      |
| STK11    | c.177T>G                  | p.S59S              | -                         |       |      | 5.00      | 5.86      |
| STK11    | c.72G>A                   | p.T24T              | -                         |       |      | 5.30      | 6.00      |
| STK11    | c.141C>A                  | p.G47G              | -                         |       |      | 5.71      | 6.47      |
| STK11    | c.84C>G                   | p.R28R              | -                         |       |      | 5.00      | 5.91      |
| STK11    | c.114G>C                  | p.P38P              | -                         |       |      | 5.41      | 6.20      |
| TP53     | c.215C>G                  | p.P72R              | COSM250061                | 54.45 | 49.6 | 61.36     | 55.0      |

| pt. #242 |                           |                     |                        |       |           |           |           |           |
|----------|---------------------------|---------------------|------------------------|-------|-----------|-----------|-----------|-----------|
| GENE     | Nucleotide variant        | Amino acid mutation | COSMIC/dbSNP ID number | gDNA  | CTC M-/E+ | CTC M+/E+ | CTC M+/E- | CTC M-/E- |
| ABL1     | c.750G>C                  | p.G250G             | -                      |       |           |           | 15.24     |           |
| ABL1     | c.774G>A                  | p.E258E             | -                      |       |           |           | 17.64     |           |
| ABL1     | c.747C>G                  | p.G249G             | -                      |       |           |           | 17.45     |           |
| ABL1     | c.714A>G                  | p.E238E             | -                      |       |           |           | 17.58     |           |
| APC      | c.4479G>A                 | p.T1493T            | COSM3760869            | 50.30 | 53.94     | 49.12     | 50.82     | 53.24     |
| ATM      | <b>c.1810C&gt;T</b>       | <b>p.P604S</b>      | <b>COSM22499</b>       |       |           | 6.91      |           |           |
| ATM      | c.1874A>G                 | p.N625S             | -                      |       |           |           | 8.85      |           |
| CDKN2A   | c.234C>T                  | p.H74H              | -                      |       |           |           | 13.78     |           |
| CSF1R    | c.*1841TG>GA              | p.?                 | rs386693509            | 99.70 | 99.57     | 99.41     | 99.77     | 100       |
| EGFR     | c.2361G>A                 | p.Q787Q             | COSM1451600            | 99.65 | 100       | 100       | 100       | 99.45     |
| ERBB4    | c.421+58A>G               | p.?                 | rs839541               | 48.70 | 54.75     | 51.35     | 64.00     | 49.53     |
| FBXW7    | <b>c1702G&gt;A</b>        | <b>p.V568M</b>      | -                      |       |           |           | 10.60     |           |
| FBXW7    | c1704G>A                  | p.V568V             | -                      |       |           |           | 10.50     |           |
| FBXW7    | c.1737G>A                 | p.G580G             | -                      |       | 8.76      |           | 10.60     |           |
| FBXW7    | c.1776T>C                 | p.N593N             | -                      |       | 9.00      |           | 10.26     |           |
| FBXW7    | c.1716T>C                 | p.N572N             | -                      |       | 8.45      |           | 10.51     |           |
| FGFR3    | c.1953G>A                 | p.T651T             | rs7688609              | 99.86 | 99.87     | 99.73     | 99.70     | 98.97     |
| FLT3     | c.1310-3T>C               | p.?                 | rs2491231              | 52.55 | 56.68     | 57.85     | 56.90     | 51.30     |
| HRAS     | c.81T>C                   | p.H27H              | COSM249860             | 50.46 | 48.79     | 45.61     | 50.89     | 42.46     |
| KDR      | c.1416A>T                 | p.Q47H              | COSM149673             | 14.27 |           |           | 11.70     |           |
| KDR      | c.2615-36A>CA             | p.?                 | rs3214870              | 41.91 | 54.70     | 39.74     | 47.30     | 51.71     |
| KIT      | <b>c.1621A&gt;C</b>       | <b>p.M541L</b>      | <b>COSM28026</b>       | 51.05 | 56.51     | 46.23     | 38.7      | 47.71     |
| NRAS     | <b>c.181C&gt;A</b>        | <b>p.Q61K</b>       | <b>COSM580</b>         |       | 9.15      |           |           |           |
| PDGFRA   | <b>c.1667A&gt;G</b>       | <b>p.E556G</b>      | -                      |       |           |           | 8.66      |           |
| PDGFRA   | c.2017A>C                 | p.I673L             | -                      |       |           |           | 8.82      |           |
| PDGFRA   | c.1701A>G                 | p.P567P             | rs1873778              | 99.90 | 99.90     | 100       | 100       | 99.80     |
| PIK3CA   | <b>c.323G&gt;A</b>        | <b>p.R108H</b>      | <b>COSM27497</b>       |       |           |           | 5.69      |           |
| PIK3CA   | c.352+40A>G               | p.?                 | rs3729674              | 49.85 | 51.93     | 54.80     | 34.34     | 48.78     |
| PTEN     | c.324T>C                  | p.L108L             | -                      |       |           |           | 9.43      |           |
| RET      | c.1908G>A                 | p.T382T             | rs886038663            |       |           |           | 9.98      |           |
| RET      | c.2307G>T                 | p.L769L             | rs1800861              | 48.97 | 41.55     | 51.89     | 67.86     | 52.03     |
| SMAD4    | c.727G>A                  | p.G243R             | -                      |       |           |           | 10.75     |           |
| SMAD4    | <b>c.1216G&gt;A</b>       | <b>p.A406T</b>      | <b>COSM10103</b>       |       |           |           | 11.76     |           |
| SMAD4    | c.1335A>G                 | p.R445R             | -                      |       | 14.00     | 5.23      | 10.00     | 8.00      |
| SMAD4    | c.1059C>T                 | p.Y353Y             | rs863224400            |       |           |           | 13.06     |           |
| SMAD4    | c.1062G>A                 | p.V354V             | -                      |       |           |           | 12.86     |           |
| SMAD4    | c.1089T>C                 | p.C363C             | -                      |       |           |           | 13.00     |           |
| SMAD4    | c.1035C>T                 | p.C345C             | -                      |       |           |           | 13.07     |           |
| SMAD4    | c.1002G>A                 | p.Q334Q             | rs773598775            |       |           |           | 13.12     |           |
| SMAD4    | c.990A>G                  | p.E330E             | -                      |       |           |           | 13.51     |           |
| SMO      | <b>c.1214T&gt;C</b>       | <b>p.L405P</b>      | -                      |       | 6.72      |           |           |           |
| SMO      | c.1623G>A                 | p.T541T             | COSM1085436            |       | 6.38      |           | 12.48     |           |
| SMO      | c.1566G>A                 | p.L522L             | -                      |       | 6.58      |           | 12.21     |           |
| SMO      | c.1539G>C                 | p.P513P             | -                      |       | 6.62      |           | 12.35     |           |
| SMO      | c.1545T>C                 | p.L515L             | -                      |       | 6.74      |           | 12.32     |           |
| SMO      | c.1590_1591del<br>CGinsTT | p.IA530_531IS       | -                      |       | 7.00      |           | 12.05     |           |
| STK11    | c.465-51T>C               | p.?                 | rs2075606              |       |           |           | 18.51     |           |
| STK11    | <b>c.536C&gt;T</b>        | <b>p.P179L</b>      | <b>COSM51520</b>       |       |           |           | 10.87     |           |
| STK11    | c.174C>G                  | p.G58G              | rs756661578            |       | 9.31      |           |           |           |
| STK11    | c.171A>G                  | p.E57E              | rs1060503785           |       | 9.35      |           |           |           |
| STK11    | c.177T>G                  | p.S59S              | -                      |       | 9.37      |           |           |           |
| STK11    | c.72G>A                   | p.T24T              | -                      |       | 9.35      |           |           |           |
| STK11    | c.141C>A                  | p.G47G              | -                      |       | 9.46      |           |           |           |
| STK11    | c.84C>G                   | p.R28R              | -                      |       | 9.40      |           |           |           |
| STK11    | c.114G>C                  | p.P38P              | -                      |       | 10.21     |           |           |           |
| TP53     | <b>c.388C&gt;A</b>        | <b>p.L130I</b>      | <b>IARCTP53</b>        |       | 5.00      |           | 5.96      |           |
| TP53     | c.215C>G                  | p.P72R              | COSM250061             | 98.40 | 97.51     | 97.10     | 97.12     | 96.38     |
| TP53     | c.1043T>C                 | p.L348S             | -                      |       |           |           | 5.43      |           |
| VHL      | c.378T>C                  | p.D126D             | -                      |       |           |           | 6.10      |           |

| pt. #253 |                    |                     |                        |       |           |           |           |
|----------|--------------------|---------------------|------------------------|-------|-----------|-----------|-----------|
| GENE     | Nucleotide variant | Amino acid mutation | COSMIC/dbSNP ID number | gDNA  | CTC M-/E+ | CTC M+/E+ | CTC M-/E- |
| APC      | c.4479G>A          | p.T1493T            | COSM3760869            | 100   | 98.09     | nc        | 97.09     |
| APC      | c.2601A>G          | p.T867T             | -                      |       |           | 9.57      |           |
| ATM      | c.9159A>G          | p.K3053K            | rs1060504315           |       |           | 20.42     |           |
| CDH1     | c.1027C>A          | p.L343M             | -                      |       |           | 19.64     |           |
| CSF1R    | c.*1841TG>GA       | p.?                 | rs386693509            | 99.51 | 99.78     | 21.94     | 99.24     |
| EGFR     | c.2361G>A          | p.Q787Q             | COSM1451600            | 51.94 | 51.70     | nc        | 66.73     |
| ERBB4    | c.1080C>T          | p.T360T             | rs183921316            |       |           | 6.15      |           |
| FBXW7    | c.1451G>T          | p.R484M             | COSM34016              |       |           | 39.00     |           |
| FGFR1    | c.518A>G           | p.Glu173Gly         | -                      |       |           | 27.20     |           |
| FGFR3    | c.1953G>A          | p.T651T             | rs7688609              | 100   | 99.59     | 99.38     | 99.60     |
| FGFR3    | c.1150T>C          | p.F384L             | COSM724 rs17881656     | 45.35 | 44.89     | nc        | 53.27     |
| FLT3     | c.1310-3T>C        | p.?                 | rs2491231              | 53.02 | 36.50     | 99.53     | 27.56     |
| HNF1A    | c.635A>G           | p.Q212R             | -                      |       |           | 52.45     |           |
| HRAS     | c.81T>C            | p.H27H              | COSM249860             |       |           | 52.68     |           |
| JAK3     | c.2156T>C          | p.F719S             | -                      |       |           | 17.86     |           |
| KDR      | c.798+54G>A        | p.?                 | rs7692791              | 48.00 | 40.91     | nc        | 37.64     |
| KDR      | c.1416A>T          | p.Q47H              | COSM149673             | 99.82 | 99.75     |           | 99.66     |
| KDR      | c.2615-36A>CA      | p.?                 | rs3214870              | 100   | 99.80     |           | 100       |
| KIT      | c.1936T>C          | p.Y646H             | COSM3734987            |       |           | 5.34      |           |
| PDGFRA   | c.1701A>G          | p.P567P             | rs1873778              | 100   | 100       | nc        | 100       |
| PIK3CA   | c.1633G>A          | p.E545K             | COSM763                |       | 48.63     |           | 53.55     |
| PIK3CA   | c.3140A>T          | p.H1047L            | COSM776                |       | 59.35     |           | 68.78     |
| PIK3CA   | c.1348C>T          | p.H450Y             | -                      |       |           | 18.75     |           |
| PIK3CA   | c.3076C>T          | p.(=)               | -                      |       |           | 6.06      |           |
| RET      | c.2307G>T          | p.L769L             | rs1800861              |       |           | 99.58     |           |
| SMARCB1  | c.1119-41G>A       | p.?                 | COSM1090               | 49.38 | 32.62     |           | 25.79     |
| SMO      | c.623A>G           | p.E208G             | -                      |       |           | 5.88      |           |
| SMO      | c.646C>T           | p.Q216Ter           | COSM6906070            |       |           | 11.57     |           |
| STK11    | c.465-51T>C        | p.?                 | rs2075606              | 49.67 | 37.45     | nc        | 33.20     |
| TP53     | c.215C>G           | p.P72R              | COSM250061             | 50.77 | 52.39     | nc        | 38.33     |
| TP53     | c.742C>T           | p.R248TW            | COSM10656              |       | 20.19     | nc        | 38.45     |

| pt. #274 |                    |                     |                        |      |      |           |           |
|----------|--------------------|---------------------|------------------------|------|------|-----------|-----------|
| GENE     | Nucleotide variant | Amino acid mutation | COSMIC/dbSNP ID number | gDNA | FFPE | CTC M+/E+ | CTC M+/E- |
| CSF1R    | c.*1841TG>GA       | p.?                 | rs386693509            | 26.5 | 41.8 | 33.93     | 32.2      |
| EGFR     | c.2361G>A          | p.Q787Q             | COSM1451600            | 51.8 | 51.4 | 52.76     | 53.4      |
| ERBB4    | c.421+58A>G        | p.?                 | rs839541               | 48.5 | 55.0 | 51.43     | 46.9      |
| FGFR3    | c.1953G>A          | p.T651T             | rs7688609              | 99.5 | 99.5 | 99.70     | 99.6      |
| HRAS     | c.81T>C            | p.H27H              | COSM249860             | 52.2 | 53.6 | 48.09     | 48.9      |
| IDH1     | c.315C>T           | p.G105G             | rs11554137             | 50.4 | 44.9 | 43.17     | 47.0      |
| KDR      | c.798+54G>A        | p.?                 | rs7692791              | 99.9 | 96.9 | 100       | 99.6      |
| KDR      | c.4035T>C          | p.P1345P            | -                      |      |      |           | 16.4      |
| PDGFRA   | c.1701A>G          | p.P567P             | rs1873778              | 100  | 99.9 | 100       | 99.9      |
| RET      | c.2307G>T          | p.L769L             | rs1800861              | 100  | 99.5 | 99.95     | 99.9      |
| RET      | c.2712C>G          | p.S904S             | rs1800836              | 46.9 | 46.7 | 49.65     | 43.9      |
| SMAD4    | c.955+58C>T        | p.?                 | rs948588               | 51.5 | 48.4 | 40.70     | 48.8      |
| TP53     | c.215C>G           | p.P72R              | COSM250061             | 51.3 | 63.4 | 59.16     | 50.7      |
| TP53     | <b>c.833C&gt;T</b> | <b>p.P278L</b>      | <b>COSM10863</b>       |      | 13.8 |           |           |

| pt. #279 |                     |                     |                        |       |      |           |           |           |
|----------|---------------------|---------------------|------------------------|-------|------|-----------|-----------|-----------|
| GENE     | Nucleotide variant  | Amino acid mutation | COSMIC/dbSNP ID number | gDNA  | FFPE | CTC M+/E+ | CTC M+/E- | CTC M-/E- |
| APC      | c.4479G>A           | p.T1493T            | COSM3760869            |       |      |           | 10.07     | 11.27     |
| ATM      | <b>c.1810C&gt;T</b> | <b>p.P604S</b>      | <b>COSM22499</b>       |       |      |           | 7.31      | 11.1      |
| CSF1R    | c.*1841TG>GA        | p.?                 | rs386693509            | 100   | 100  | 99.8      | 82.94     | 75.3      |
| EGFR     | c.2361G>A           | p.Q787Q             | COSM1451600            | 99.40 | 99.2 | 99.5      | 98.02     | 100       |
| EGFR     | <b>c.2257C&gt;T</b> | <b>p.P753S</b>      | <b>COSM6268</b>        |       |      |           |           | 5.14      |
| ERBB4    | c.421+51C>T         | p.?                 | -                      |       |      |           |           | 7.86      |
| ERBB4    | c.421+58A>G         | p.?                 | rs839541               | 99.31 | 99.7 | 99.9      | 81.90     | 90.1      |
| FGFR3    | c.1953G>A           | p.T651T             | rs7688609              | 99.68 | 99.5 | 99.7      | 99.75     | 99.7      |
| FGFR3    | c.1959+22G>A        | p.?                 | rs3135898              | 47.50 | 46.9 | 40.3      | 32.29     | 40.2      |
| FGFR3    | <b>c.2408G&gt;A</b> | <b>p.G803D</b>      | <b>COSM7208599</b>     |       |      | 6.95      |           |           |
| FGFR3    | <b>c.1150T&gt;C</b> | <b>p.F384L</b>      | <b>COSM724</b>         |       |      |           | 6.91      |           |
| FLT3     | c.1310-3T>C         | p.?                 | rs2491231              | 51.05 | 50.9 | 44.1      | 59.03     | 60.4      |
| HNF1A    | <b>c.620G&gt;A</b>  | <b>p.G207D</b>      | <b>COSM24931</b>       |       |      | 5.05      |           |           |
| HRAS     | c.81T>C             | p.H27H              | COSM249860             |       |      |           | 6.14      |           |
| IDH1     | c.315C>T            | p.G105G             | rs11554137             |       |      |           | 5.50      |           |
| KDR      | c.798+54G>A         | p.?                 | rs7692791              |       |      |           | 8.60      | 5.00      |
| KIT      | <b>c.1621A&gt;C</b> | <b>p.M541L</b>      | <b>COSM28026</b>       | 50.90 | 48.5 | 30.9      | 32.52     | 39.5      |
| MPL      | c.1565+27G>A        | p.?                 | -                      |       |      | 6.15      |           |           |
| PDGFRA   | c.1701A>G           | p.P567P             | rs1873778              | 100   | 99.4 | 100       | 99.94     | 100       |
| PDGFRA   | c.2472C>T           | p.V824V             | COSM22413              |       |      |           | 5.05      | 9.00      |
| PIK3CA   | c.1173A>G           | p.I391M             | rs2230461              | 54.45 | 60.5 | 49.5      | 54.09     | 61.4      |
| PIK3CA   | c.352+40A>G         | p.?                 | rs3729674              | 52.23 | 48.5 | 42.6      | 45.49     | 41.6      |
| PIK3CA   | <b>c.3140A&gt;T</b> | <b>p.H1047L</b>     | <b>COSM776</b>         |       | 29.5 |           |           |           |
| RET      | c.2307G>T           | p.L769L             | rs1800861              | 99.80 | 99.9 | 100       | 93.97     | 96.2      |
| RET      | c.2712C>G           | p.S904S             | rs1800836              | 47.62 | 46.5 | 56.8      | 47.29     | 50.1      |
| SMAD4    | c.1059C>T           | p.Y353Y             | rs863224400            |       |      |           |           | 5.10      |
| SMARCB1  | c.1119-41G>A        | p.?                 | COSM1090               | 48.10 | 72.7 | 63.3      | 39.30     | 46.5      |
| SMO      | c.1623G>A           | p.T541T             | COSM1085436            |       |      |           | 5.26      |           |
| SMO      | c.1566G>A           | p.L522L             | -                      |       |      |           | 5.41      |           |
| SMO      | c.1539G>C           | p.P513P             | -                      |       |      |           | 5.40      |           |
| SMO      | c.1545T>C           | p.L515L             | -                      |       |      |           | 5.40      |           |
| STK11    | c.465-51T>C         | p.?                 | rs2075606              |       |      |           | 14.79     | 10.7      |
| STK11    | c.80A>G             | p.H27R              | -                      |       |      |           | 5.25      |           |
| TP53     | c.215C>G            | p.P72R              | COSM250061             | 97.85 | 96.4 | 98.4      | 98.65     | 86.4      |

| pt. #335 |                     |                     |                        |       |      |           |
|----------|---------------------|---------------------|------------------------|-------|------|-----------|
| GENE     | Nucleotide variant  | Amino acid mutation | COSMIC/dbSNP ID number | gDNA  | FFPE | CTC M+/E- |
| ABL1     | c.750G>C            | p. G250G            | -                      |       |      | 7.80      |
| ABL1     | c.774G>A            | p.E258E             | -                      |       |      | 10.0      |
| ABL1     | c.747C>G            | p.G249G             | -                      |       |      | 9.00      |
| ABL1     | c.714A>G            | p.E238E             | -                      |       |      | 9.70      |
| APC      | c.4479G>A           | p.T1493T            | COSM3760869            | 51.8  | 51.9 | 57.3      |
| APC      | <b>c.4348C&gt;T</b> | <b>p.R1450*</b>     | <b>COSM13127</b>       |       |      | 5.25      |
| AKT1     | c.48G>T             | p.G16G              | -                      |       | 43.8 |           |
| ATM      | <b>c.7328G&gt;A</b> | <b>p.R2443Q</b>     | <b>COSM20404</b>       |       |      | 12.20     |
| CSF1R    | c.*1841TG>GA        | p.?                 | rs386693509            | 99.8  | 97.0 | 64.0      |
| EGFR     | c.2361G>A           | p.Q787Q             | COSM1451600            |       | 6.17 |           |
| ERBB4    | c.421+58A>G         | p.?                 | rs839541               |       |      | 10.0      |
| FGFR3    | c.1953G>A           | p.T651T             | rs7688609              | 99.8  | 99.4 | 96.3      |
| FLT3     | c.1310-3T>C         | p.?                 | rs2491231              | 100   | 96.7 | 64.5      |
| HRAS     | c.81T>C             | p.H27H              | COSM249860             | 98.9  | 95.8 | 97.5      |
| KDR      | c.798+54G>A         | p.?                 | rs7692791              | 47    | 38   | 49.8      |
| KDR      | c.4035T>C           | p.P1345P            | -                      |       |      | 5.36      |
| KDR      | c.4008C>T           | p.T1336T            | COSM35855              | 52.4  | 48.0 | 26.5      |
| KDR      | c.4022A>G           | p.Q1341R            | -                      |       |      | 5.01      |
| KDR      | <b>c.2946C&gt;T</b> | <b>p.S982S</b>      | <b>COSM4992129</b>     |       |      | 5.75      |
| MET      | <b>c.2962C&gt;T</b> | <b>p.R988C</b>      | <b>COSM1666978</b>     |       |      | 9.0       |
| PDGFRA   | c.1701A>G           | p.P567P             | rs1873778              | 100   | 99.7 | 99.8      |
| PDGFRA   | c.2472C>T           | p.V824V             | COSM22413              |       |      | 26.4      |
| PTEN     | <b>c.959T&gt;A</b>  | <b>p.L320*</b>      | <b>COSM35671</b>       |       | 62.7 | 6.06      |
| RET      | c.2307G>T           | p.L769L             | rs1800861              | 46,25 | 35.1 | 68.6      |
| RET      | c.2712C>G           | p.S904S             | rs1800836              |       |      | 6.05      |
| SMO      | c.1623G>A           | p.T541T             | COSM1085436            |       |      | 6.25      |
| SMO      | c.1539G>C           | p.P513P             | -                      |       |      | 6.05      |
| SMO      | c.1545T>C           | p.L515L             | -                      |       |      | 6.30      |
| STK11    | c.465-51T>C         | p.?                 | rs2075606              |       | 11.7 |           |
| STK11    | <b>c.976C&gt;A</b>  | <b>p.P326T</b>      | <b>rs771632414</b>     |       |      | 10.10     |
| STK11    | c.598-14C>T         | p.?                 | rs769378511            |       |      | 5.45      |
| TP53     | c.215C>G            | p.P72R              | COSM250061             | 51,3  | 44.1 | 62.1      |
| TP53     | <b>c.4G&gt;A</b>    | <b>p.Glu2Lys</b>    | <b>rs769884991</b>     |       |      | 5.95      |
| VHL      | c.321C>A            | p.R107R             | -                      |       |      | 6.04      |



| pt. #337 |                       |                     |                        |       |      |           |           |
|----------|-----------------------|---------------------|------------------------|-------|------|-----------|-----------|
| GENE     | Nucleotide variant    | Amino acid mutation | COSMIC/dbSNP ID number | gDNA  | FFPE | CTC M+/E+ | CTC M+/E- |
| ALK      | c.3836+1G>T           | Splice site         | -                      |       |      | 5.71      |           |
| APC      | c.4479G>A             | p.T1493T            | COSM3760869            | 99.82 | 99.8 | 100       | 100       |
| APC      | c.4114C>A             | p.P1372T            | -                      |       |      | 5.38      |           |
| AKT1     | c.528C>A              | p.Tyr176*           | -                      |       |      |           | 6.19      |
| ATM      | c.8177C>T             | p.Ala2726Val        | -                      |       |      |           | 6.80      |
| ATM      | c.3878A>G             | p.N1293S            | COSM5490564            |       |      |           | 6.95      |
| ATM      | c.2578G>T             | p.Asp860Tyr         | -                      |       |      |           | 8.32      |
| ATM      | c.3947C>T             | p.Thr1316Ile        | -                      |       |      |           | 9.05      |
| BRAF     | c.1379G>T             | p.Gly460Val         | rs121913351            |       |      |           | 6.29      |
| CDH1     | c.1097C>A             | p.T366N             | -                      |       |      | 12.02     |           |
| CSF1R    | c.*1841TG>GA          | p.?                 | rs386693509            | 28.43 | 51.5 | 29.54     | 45.2      |
| EGFR     | c.2361G>A             | p.Q787Q             | COSM1451600            | 53.30 | 48.1 | 74.02     | 49.00     |
| EGFR     | c.2469+32G>T          | p.?                 | -                      |       |      |           | 11.8      |
| ERBB2    | c.2527C>T             | p.His843Tyr         | -                      |       |      |           | 8.74      |
| ERBB2    | c.2551G>T             | p.V851L             | -                      |       |      | 5.04      |           |
| ERBB4    | c.421+58A>G           | p.?                 | rs839541               |       |      | 6.98      |           |
| ERBB4    | c.1084A>G             | p.I362V             | -                      |       |      |           | 6.32      |
| ERBB4    | c.1015A>G             | p.T339A             | -                      |       |      |           | 7.04      |
| ERBB4    | c.915G>A              | p.V305V             | rs781470325            |       |      |           | 7.68      |
| FGFR1    | c.497_498insTGA       | p.D166dup           | rs776622310            | 30.26 | 42.5 | 29.50     | 41.1      |
| FGFR2    | c.1130A>G             | p.E377G             | -                      |       |      |           | 6.97      |
| FGFR2    | c.939+41C>A           | p.?                 | -                      |       |      |           | 11.0      |
| FGFR3    | c.1953G>A             | p.T651T             | rs7688609              | 99.51 | 99.6 | 100       | 99.9      |
| FLT3     | c.1310-3T>C           | p.?                 | rs2491231              | 51.17 | 51.7 | 76.10     | 47.5      |
| FLT3     | c.2001G>T             | p.Q667H             | -                      |       |      | 10.95     |           |
| FLT3     | c.2537G>T             | p.G846V             | -                      |       |      | 8.30      |           |
| HNF1A    | c.771C>A              | p.N257K             | -                      |       |      |           | 5.91      |
| HRAS     | c.60C>T               | p.T20T              | ExAC                   |       |      | 8.93      |           |
| IDH1     | c.354C>T              | p.P118P             | ExAC                   |       |      | 9.10      |           |
| KDR      | c.798+54G>A           | p.?                 | rs7692791              | 38.37 | 40.7 | 27.91     | 36.6      |
| KDR      | c.1416A>T             | p.Q47H              | COSM149673             | 51.34 | 39.1 | 33.05     | 72.8      |
| KDR      | c.3849-24C>A          | p.?                 | rs10006115             | 54.85 | 50.9 | 51.68     | 36.7      |
| KDR      | c.3454A>G             | p.T1152A            | -                      |       |      |           | 6.62      |
| KDR      | c.2615-36A>CA         | p.?                 | rs3214870              | 56.6  | 49.7 | 33.54     | 38.5      |
| KDR      | c.2654A>G             | p.E885G             | -                      |       |      | 8.64      |           |
| KIT      | c.1904A>G             | p.E635G             | COSM144512             |       |      |           | 5.74      |
| MET      | c.3394+3A>G           | p.?                 | COSM5731184            |       |      |           | 8.22      |
| NOTCH1   | c.5026G>A             | p.V1676I            | COSM327182             |       |      |           | 10.6      |
| NOTCH1   | c.5019-4C>A           | p.?                 | -                      |       |      |           | 6.95      |
| NOTCH1   | c.7362C>T             | p.H2454H            | -                      |       |      | 7.33      |           |
| NRAS     | c.394G>T              | p.E132Ter           | -                      |       |      | 5.17      |           |
| PDGFRA   | c.1701A>G             | p.P567P             | rs1873778              | 100   | 100  | 100       | 100       |
| PDGFRA   | c.2472C>T             | p.V824V             | COSM22413              | 47.9  | 55.1 | 41.78     | 70.0      |
| PDGFRA   | c.1955G>T             | p.G652V             | COSM3946437            |       |      | 5.47      |           |
| PIK3CA   | c.352+40A>G           | p.?                 | rs3729674              | 51.88 | 46.3 | 48.60     | 62.7      |
| PIK3CA   | c.352+1G>A            | Splice site         | -                      |       |      | 7.01      |           |
| PIK3CA   | c.3196G>A             | p.A1066T            | COSM6941468            |       |      | 18.0      | 64.0      |
| PIK3CA   | c.1238A>G             | p.K413R             | -                      |       |      |           | 8.04      |
| PTEN     | c.63C>A               | p.F21L              | -                      |       |      |           | 7.24      |
| PTEN     | c.209+45A>G           | p.?                 | -                      |       |      | 5.17      |           |
| PTEN     | c.1008C>T             | p.Y336Y             | -                      |       |      | 7.76      |           |
| PTPN11   | c.1578G>A             | p.Q526Q             | -                      |       |      | 5.62      |           |
| PTPN11   | c.1478C>A             | p.T493N             | -                      |       |      | 5.90      |           |
| RB1      | c.1389+37C>T          | p.?                 | rs373682367            |       |      | 5.01      |           |
| RET      | c.2307G>T             | p.L769L             | rs1800861              | 100   | 100  | 100       | 99.9      |
| RET      | c.2712C>G             | p.S904S             | rs1800836              | 51.67 | 43.5 | 46.66     | 45.5      |
| RET      | c.2681G>T             | p.G894V             | -                      |       |      |           | 5.97      |
| SMAD4    | c.949C>A              | p.H317AN            | -                      |       |      | 7.22      |           |
| SMAD4    | c.955+58C>T           | p.?                 | rs948588               | 50.95 | 58.4 | 24.21     | 66.8      |
| SMAD4    | c.573G>T              | p.S191S             | COSM6475980            |       |      |           | 5.60      |
| SMO      | c.1545T>C             | p.L515L             | -                      |       |      | 5.66      |           |
| SMO      | c.1590_1591delCGinsTT | p.IA530_531IS       | -                      |       |      |           |           |
| SMO      | c.1592C>T             | p.A531V             | -                      |       |      | 5.35      |           |
| SMO      | c.677A>G              | p.E226G             | -                      |       |      |           | 5.50      |
| SMO      | c.614G>A              | p.S205N             | -                      |       |      |           | 6.40      |
| STK11    | c.465-51T>C           | p.?                 | rs2075606              | 47.93 | 43.9 | 65.61     | 60.5      |
| TP53     | c.215C>G              | p.P72R              | COSM250061             | 97.99 | 97.2 | 98.78     | 99.1      |

| pt. #371 |                      |                     |                        |       |       |           |           |
|----------|----------------------|---------------------|------------------------|-------|-------|-----------|-----------|
| GENE     | Nucleotide variant   | Amino acid mutation | COSMIC/dbSNP ID number | gDNA  | FFPE  | CTC M+/E- | CTC M-/E- |
| APC      | c.4479G>A            | p.T1493T            | COSM3760869            | 99.78 | 97.7  | 88.0      | 87.3      |
| APC      | c.4548A>T            | p.I1516I            | -                      |       |       | 6.76      |           |
| APC      | c.4524T>C            | p.A1508A            | rs767025305            |       |       | 6.95      |           |
| APC      | c.4512C>T            | p.S1504S            | -                      |       |       | 7.40      |           |
| APC      | c.4476C>T            | p.A1492A            | -                      |       |       | 7.84      |           |
| ATM      | <b>c.1810C&gt;T</b>  | <b>p.P604S</b>      | <b>COSM22499</b>       |       |       | 6.66      |           |
| CSF1R    | c.*1841TG>GA         | p.?                 | rs386693509            | 34.48 | 23.50 | 24.4      | 31.6      |
| EGFR     | c.2361G>A            | p.Q787Q             | COSM1451600            | 48.80 | 51.6  | 59.7      | 48.1      |
| ERBB2    | c.2638G>A            | p.D880N             | COSM7002319            |       |       |           | 5.02      |
| ERBB2    | c.2642G>A            | p.G881E             | -                      |       |       |           | 5.19      |
| ERBB2    | c.2644G>T            | p.G882C             | -                      |       |       |           | 5.41      |
| FGFR3    | c.1953G>A            | p.T651T             | rs7688609              | 100   | 99.6  | 99.6      | 99.5      |
| FLT3     | c.1310-3T>C          | p.?                 | rs2491231              | 100   | 100   | 100       | 100       |
| HRAS     | c.81T>C              | p.H27H              | COSM249860             | 48.50 | 58.0  | 60.6      | 49.3      |
| KDR      | c.798+54G>A          | p.?                 | rs7692791              | 53.00 | 43.00 | 45.4      | 49.00     |
| KIT      | c.103T>C             | p.S35P              | -                      |       |       |           | 5.20      |
| KIT      | <b>c.1638A&gt;G</b>  | <b>p.K546K</b>      | <b>COSM21983</b>       | 44.84 | 50.8  | 50.7      | 53.6      |
| MET      | c.3798G>A            | p.K1266K            | -                      |       |       | 6.46      |           |
| PIK3CA   | c.1173A>G            | p.I391M             | rs2230461              |       |       | 8.50      |           |
| PIK3CA   | c.352+40A>G          | p.?                 | rs3729674              | 45.36 | 50.3  | 43.1      | 39.8      |
| PIK3CA   | <b>c.1633G&gt;A</b>  | <b>p.E545K</b>      | <b>COSM763</b>         |       | 20.7  |           |           |
| PTEN     | <b>c.991G&gt;A</b>   | <b>p.D331N</b>      | <b>COSM6327339</b>     |       |       | 7.90      |           |
| PTEN     | <b>c.635-1G&gt;A</b> | <b>p.?</b>          | <b>COSM28920</b>       |       |       | 6.75      |           |
| PTPN11   | c.193C>T             | p.L65L              | -                      |       |       | 5.45      |           |
| PTPN11   | <b>c.169C&gt;T</b>   | <b>p.Q57*</b>       | <b>-</b>               |       |       | 6.00      |           |
| RET      | c.2307G>T            | p.L769L             | rs1800861              | 44.58 | 41.6  | 53.2      | 53.3      |
| SMAD4    | <b>c.767A&gt;T</b>   | <b>p.Q256L</b>      | <b>COSM5546625</b>     |       |       |           | 11.2      |
| SMAD4    | c.1335A>G            | p. R445R            | -                      |       |       | 10.0      | 10.0      |
| SMO      | c.1623G>A            | p.T541T             | COSM1085436            |       |       | 5.15      |           |
| SMO      | c.1566G>A            | p.L522L             | -                      |       |       | 5.16      |           |
| SMO      | c.1539G>C            | p.P513P             | -                      |       |       | 5.65      |           |
| SMO      | c.1545T>C            | p.L515L             | -                      |       |       | 5.70      |           |
| STK11    | c.465-51T>C          | p.?                 | rs2075606              | 56.80 | 46.0  | 41.2      | 61.7      |
| TP53     | <b>c.388C&gt;A</b>   | <b>p.L130I</b>      | <b>IARCTP53</b>        |       |       |           | 9.70      |
| TP53     | c.215C>G             | p.P72R              | COSM250061             | 97.13 | 100   | 98.2      | 95.7      |

| GENE    | Nucleotide variant | Amino acid mutation | COSMIC/dbSNP ID number | gDNA  | CTC M-/E+ | CTC M+/E+ | CTC M+/E- |
|---------|--------------------|---------------------|------------------------|-------|-----------|-----------|-----------|
| ABL1    | c.720G>A           | p.T240T             | -                      | -     | 9.66      | -         | -         |
| APC     | c.4479G>A          | p.T1493T            | COSM3760869            | 49.27 | 71.74     | 47.17     | 52.01     |
| APC     | c.2613A>G          | p.G871G             | -                      | -     | -         | -         | 9.79      |
| APC     | c.2652A>G          | p.A884A             | -                      | -     | -         | -         | 9.06      |
| APC     | c.3362T>C          | p.I1121T            | -                      | -     | 26.44     | -         | -         |
| AKT1    | c.489G>A           | p.k163K             | rs576374556            | -     | 9.05      | -         | -         |
| ATM     | c.1810C>T          | p.P604S             | COSM22499              | -     | 68.97     | 14.34     | -         |
| ATM     | c.3927A>G          | p.A1309A            | rs155093665            | -     | -         | -         | 6.15      |
| ATM     | c.5056A>G          | p.L1666V            | rs145453814            | -     | -         | -         | 5.05      |
| ATM     | c.5381T>C          | p.L1794P            | -                      | -     | -         | -         | 9.80      |
| CDHL1   | c.2511D>C          | p.V95A              | rs878854698            | -     | -         | -         | 10.85     |
| CDHL1   | c.1078A>G          | p.T360A             | -                      | -     | -         | -         | 5.94      |
| CDHL1   | c.237A>G           | p.T79T              | -                      | -     | -         | -         | 7.00      |
| CDKN2A  | c.310C>T           | p.L104V             | -                      | -     | 32.16     | -         | -         |
| CSF1R   | c.1841T>C>G>A      | p.?                 | rs386693509            | 99.69 | 100       | 37.36     | 46.42     |
| EGFR    | c.2361G>A          | p.Q787Q             | COSM1451600            | 99.60 | 100       | 99.39     | 97.08     |
| EGFR    | c.2300C>T          | p.A787V             | COSM26445              | -     | 11.27     | -         | -         |
| EGFR    | c.2469>57C>T       | p.?                 | -                      | -     | -         | -         | 5.35      |
| EGFR    | c.2469>27G>A       | p.?                 | rs368440941            | -     | -         | -         | 5.85      |
| EGFR    | c.2459A>G          | p.Q820R             | COSM85898              | -     | -         | -         | 5.95      |
| EGFR    | c.2436G>A          | p.R821I             | -                      | -     | 16.05     | -         | -         |
| EGFR    | c.875T>C           | p.V292A             | ExAC                   | -     | 6.67      | -         | -         |
| ERBB2   | c.2307>46A>G       | p.?                 | rs4252645              | -     | 5.30      | -         | -         |
| ERBB2   | c.2307>66T>A       | p.?                 | -                      | -     | 5.45      | -         | -         |
| ERBB4   | c.421>58A>G        | p.?                 | rs839541               | -     | 28.25     | 47.47     | 47.85     |
| FBXW7   | c.1319A>G          | p.Asp440Gly         | -                      | -     | 9.89      | -         | -         |
| FBXW7   | c.861>17A>G        | p.?                 | -                      | -     | 13.55     | -         | -         |
| FBXW7   | c.1442C>T          | p.A481V             | COSM4122764            | -     | -         | -         | 7.10      |
| FGFR3   | c.1953G>A          | p.T651T             | rs7688609              | 99.60 | 100       | 99.53     | 99.61     |
| FGFR3   | c.1959>22G>A       | p.?                 | rs1335898              | 55.02 | -         | 25.04     | 32.14     |
| FGFR3   | c.1150T>C          | p.F384L             | COSM7724               | -     | 41.90     | 6.77      | -         |
| FLT3    | c.1310>3T>C        | p.?                 | rs2491231              | 99.75 | nc        | 99.75     | 94.15     |
| FLT3    | c.2541>4A>G        | p.?                 | -                      | -     | 24.06     | -         | -         |
| FLT3    | c.2541>11T>C       | p.?                 | -                      | -     | 6.58      | -         | -         |
| GNAQ    | c.735>1G>T         | Splice site         | -                      | -     | -         | -         | 5.75      |
| HNF1A   | c.612C>T           | p.F204F             | -                      | -     | -         | -         | 5.85      |
| HNF1A   | c.638T>C           | p.I213T             | -                      | -     | -         | -         | 6.31      |
| HRA5    | c.81T>C            | p.H27H              | COSM249860             | 51.49 | -         | 26.70     | 27.28     |
| JAK3    | c.2128G>A          | p.T1797ter          | -                      | -     | 20.90     | -         | -         |
| KDR     | c.798>54C>A        | p.?                 | rs7692791              | -     | 18.09     | 23.09     | 9.45      |
| KDR     | c.799C>T           | p.His267Tyr         | ?                      | -     | 5.95      | -         | -         |
| KDR     | c.1416A>T          | p.Q47H              | COSM149673             | 49.32 | -         | 40.06     | 50.87     |
| KDR     | c.3849>24C>A       | p.?                 | rs10006115             | -     | -         | -         | -         |
| KDR     | c.2615>36A>CA      | p.?                 | rs3214870              | 45.09 | 24.00     | 48.35     | 43.31     |
| KDR     | c.2881C>A          | p.R961R             | -                      | -     | -         | -         | 5.00      |
| KIT     | c.1621A>C          | p.M541L             | COSM28020              | 35.74 | -         | 12.74     | 22.78     |
| KIT     | c.2019T>C          | p.C679C             | -                      | -     | 5.50      | -         | -         |
| KIT     | c.2555T>C          | p.V852A             | ExAC                   | -     | -         | -         | 5.10      |
| KRAS    | c.103A>G           | p.T35A              | COSM1360858            | -     | 4.30      | -         | -         |
| KRAS    | c.113A>G           | p.Asp38Gly          | -                      | -     | -         | -         | 5.10      |
| KRAS    | c.153T>C           | p.C51C              | COSM5009217            | -     | -         | -         | 6.16      |
| MET     | c.3770A>G          | p.N1257S            | -                      | -     | -         | -         | 10.24     |
| MET     | c.1115A>G          | p.D372G             | -                      | -     | -         | -         | 16.53     |
| MET     | c.1124A>G          | p.N375S             | COSM5020653            | -     | -         | -         | 11.24     |
| MET     | c.3794T>C          | p.V1265A            | -                      | -     | -         | -         | 9.82      |
| MLH1    | c.1184C>T          | p.A395V             | rs1064794142           | -     | 65.51     | -         | -         |
| MLH1    | c.1156A>G          | p.T386A             | -                      | -     | -         | -         | 5.25      |
| NOTCH1  | c.5019>83G>T       | p.?                 | -                      | -     | 5.25      | -         | -         |
| NOTCH1  | c.7407A>G          | p.F2479P            | -                      | -     | 6.18      | -         | -         |
| PDGFRA  | c.1701A>G          | p.P567P             | rs1873778              | 99.00 | 99.95     | 100       | 100       |
| PDGFRA  | c.2472C>T          | p.V824V             | COSM22413              | -     | 26.2      | 34.39     | 29.45     |
| PDGFRA  | c.1990T>C          | p.C664R             | -                      | -     | -         | -         | 5.50      |
| PIK3CA  | c.1173A>G          | p.L391M             | rs2230461              | 34.75 | 24.40     | -         | -         |
| PIK3CA  | c.266T>C           | p.L89P              | -                      | -     | 7.26      | -         | -         |
| PIK3CA  | c.352>40A>G        | p.?                 | rs3729674              | 49.60 | -         | -         | -         |
| PIK3CA  | c.240A>G           | p.E80E              | -                      | -     | 8.85      | -         | -         |
| PIK3CA  | c.3140A>G          | p.H1047R            | COSM775                | -     | -         | 9.41      | 7.30      |
| PIK3CA  | c.2752A>G          | p.N918D             | -                      | -     | -         | -         | 5.05      |
| PTEN    | c.995A>G           | p.L332R             | -                      | -     | 10.73     | -         | -         |
| PTEN    | c.60A>G            | p.C20G              | COSM4016447            | -     | 5.44      | -         | -         |
| PTEN    | c.966A>G           | p.K322K             | rs786201392            | -     | 23.03     | -         | -         |
| RB1     | c.1724A>G          | p.Q675R             | -                      | -     | 6.29      | -         | -         |
| RB1     | c.1975T>C          | p.Y659H             | COSM327254             | -     | 6.30      | -         | -         |
| RB1     | c.2271C>T          | p.N757N             | -                      | -     | 6.73      | -         | -         |
| RB1     | c.2253T>C          | p.S751S             | rs373070661            | -     | 6.74      | -         | -         |
| RB1     | c.2259A>C          | p.I753I             | -                      | -     | 6.75      | -         | -         |
| RB1     | c.2232C>T          | p.I744I             | -                      | -     | 6.79      | -         | -         |
| RB1     | c.2234A>G          | p.K745R             | -                      | -     | 7.75      | -         | -         |
| RB1     | c.1050>30A>G       | p.?                 | -                      | -     | -         | -         | 13.91     |
| RB1     | c.2293A>G          | p.K765E             | -                      | -     | -         | -         | 6.31      |
| RET     | c.2307C>T          | p.L769L             | rs1800861              | 49.59 | 100       | 23.37     | 29.06     |
| SMAD4   | c.1332T>C          | p.H444H             | -                      | -     | -         | -         | 5.72      |
| SMAD4   | c.1176A>G          | p.K392K             | -                      | -     | 18.33     | -         | -         |
| SMAD4   | c.525A>G           | p.E175E             | rs368528856            | -     | -         | -         | 5.65      |
| SMARCB1 | c.172G>A           | p.E58K              | -                      | -     | 15.24     | -         | -         |
| SMO     | c.1870A>T          | p.Lys624Ter         | -                      | -     | 6.52      | -         | -         |
| SMO     | c.1625T>C          | p.L542P             | -                      | -     | -         | -         | 8.18      |
| SMO     | c.1180T>C          | p.T394H             | COSM3878023            | -     | -         | -         | 14.17     |
| SMO     | c.929A>G           | p.E310G             | -                      | -     | -         | -         | 9.61      |
| STK11   | c.465>51T>C        | p.?                 | rs2075606              | -     | 75.44     | 50.34     | 19.92     |
| STK11   | c.825G>A           | p.P275P             | rs202011521            | -     | 11.67     | -         | -         |
| STK11   | c.524A>G           | p.K175R             | -                      | -     | 9.59      | -         | -         |
| TP53    | c.388C>A           | p.L130I             | IARC1P53               | -     | 9.85      | -         | -         |
| TP53    | c.742C>T           | p.R248TW            | COSM10856              | -     | -         | 11.25     | -         |
| TP53    | c.311A>G           | p.Q104R             | -                      | -     | 8.59      | -         | -         |
| TP53    | c.376>24T>C        | p.?                 | -                      | -     | 5.59      | -         | -         |
| TP53    | c.376>20T>C        | p.?                 | rs1483487754           | -     | -         | -         | 5.65      |
| TP53    | c.467C>T           | p.P223S             | COSM44816              | -     | -         | -         | 6.42      |
| VHL     | c.303G>C           | p.L101L             | ExAC                   | -     | 10.43     | -         | -         |

| pt. #382 |                           |                     |                        |       |           |           |           |
|----------|---------------------------|---------------------|------------------------|-------|-----------|-----------|-----------|
| GENE     | Nucleotide variant        | Amino acid mutation | COSMIC/dbSNP ID number | gDNA  | CTC M+/E+ | CTC M+/E- | CTC M-/E- |
| APC      | c.4479G>A                 | p.T1493T            | COSM3760869            | 99.85 | 100       | 89.97     | 99.85     |
| CSF1R    | c.*1841TG>GA              | p.?                 | rs386693509            | 100   | 99.52     | 99.-72    | 99.90     |
| EGFR     | c.2361G>A                 | p.Q787Q             | COSM1451600            | 99.70 | 99.63     | 92.89     | 98.98     |
| ERBB2    | c.2270A>G                 | p.E757G             | -                      |       |           | 5.15      |           |
| ERBB2    | c.2295A>C                 | p.K765N             | -                      |       |           | 5.17      |           |
| FBXW7    | c.1737G>A                 | p.G580G             | -                      |       | 6.36      |           |           |
| FBXW7    | c.1776T>C                 | p.N593N             | -                      |       | 6.25      |           |           |
| FBXW7    | c.1716T>C                 | p.N572N             | -                      |       | 6.45      |           |           |
| FGFR3    | c.1953G>A                 | p.T651T             | rs7688609              | 100   | 99.77     | 99.21     | 99.72     |
| FGFR3    | <b>c.1150T&gt;C</b>       | <b>p.F384L</b>      | <b>COSM724</b>         |       |           | 5.56      | 7.64      |
| FLT3     | c.1310-3T>C               | p.?                 | rs2491231              |       | 7.20      | 9.95      |           |
| FLT3     | c.2510T>A                 | p.M837K             | -                      |       |           | 5.46      |           |
| HRAS     | c.81T>C                   | p.H27H              | COSM249860             | 47.52 | 49.78     | 46.28     | 38.71     |
| IDH1     | c.315C>T                  | p.G105G             | rs11554137             | 49.85 | 52.4      | 41.65     | 44.50     |
| KDR      | c.798+54G>A               | p.?                 | rs7692791              | 33.53 | 42.58     | 39.05     | 38.12     |
| KDR      | c.1416A>T                 | p.Q47H              | COSM149673             | 49.40 | 54.73     | 40.72     | 50.63     |
| KDR      | c.2615-36A>CA             | p.?                 | rs3214870              | 46.13 | 55.61     | 41.79     | 40.00     |
| KRAS     | c.102A>G                  | p.R102R             | -                      |       |           | 6.80      |           |
| NRAS     | c.51C>T                   | p.S17S              | -                      |       | 7.06      |           |           |
| PDGFRA   | c.1701A>G                 | p.P567P             | rs1873778              | 99.90 | 100       | 99.95     | 100       |
| PIK3CA   | c.1173A>G                 | p.I391M             | rs2230461              | 58.65 | 50.48     | 38.82     | 46.45     |
| PIK3CA   | c.352+40A>G               | p.?                 | rs3729674              | 47.55 | 53.73     | 43.62     | 45.81     |
| PIK3CA   | <b>c.3196G&gt;A</b>       | <b>p.A1066T</b>     | <b>COSM6941468</b>     |       | 7.0       | 8.66      |           |
| PIK3CA   | <b>c.3140A&gt;G</b>       | <b>p.H1047R</b>     | <b>rs121913279</b>     |       | 5.00      | 5.00      |           |
| RET      | c.2307G>T                 | p.L769L             | rs1800861              | 99.85 | 99.15     | 89.29     | 99.95     |
| RET      | c.2712C>G                 | p.S904S             | rs1800836              | 50.40 | 49.20     | 41.37     | 46.12     |
| SMAD4    | c.955+58C>T               | p.?                 | rs948588               |       |           | 12.00     |           |
| SMO      | c.1623G>A                 | p.T541T             | COSM1085436            |       | 21.10     |           |           |
| SMO      | c.1566G>A                 | p.L522L             | -                      |       | 20.91     |           |           |
| SMO      | c.1539G>C                 | p.P513P             | -                      |       | 19.30     |           |           |
| SMO      | c.1545T>C                 | p.L515L             | -                      |       | 20.85     |           |           |
| SMO      | c.1590_1591del<br>CGinsTT | p.IA530_531IS       | -                      |       | 21.55     |           |           |
| STK11    | c.465-51T>C               | p.?                 | rs2075606              | 99.95 | 82.13     | 86.65     | 84.52     |
| TP53     | c.215C>G                  | p.P72R              | COSM250061             | 51.28 | 54.98     | 53.68     | 54.66     |
| TP53     | <b>c.1009C&gt;T</b>       | <b>p.R337C</b>      | <b>COSM11071</b>       |       | 11.5      |           |           |

| pt. #392 |                                         |                     |                        |       |      |           |           |
|----------|-----------------------------------------|---------------------|------------------------|-------|------|-----------|-----------|
| GENE     | Nucleotide variant                      | Amino acid mutation | COSMIC/dbSNP ID number | gDNA  | FFPE | CTC M+/E- | CTC M-/E- |
| ABL1     | c.750G>C                                | p. G250G            | -                      |       |      | 21.7      |           |
| ABL1     | c.774G>A                                | p.E258E             | -                      |       |      | 23.0      |           |
| ABL1     | c.747C>G                                | p.G249G             | -                      |       |      | 23.8      |           |
| ABL1     | c.714A>G                                | p.E238E             | -                      |       |      | 24.4      |           |
| APC      | c.4479G>A                               | p.T1493T            | COSM3760869            | 49.41 | 61.9 | 99.5      | 50.0      |
| EGFR     | c.2361G>A                               | p.Q787Q             | COSM1451600            | 99.71 | 99.9 | nd        | 100       |
| ERBB4    | <b>c.866G&gt;T</b>                      | <b>p.C289F</b>      | -                      |       |      | 22.3      |           |
| ERBB4    | c.421+58A>G                             | p.?                 | rs839541               | 51.06 | 42.5 | nd        | 51.7      |
| FGFR3    | c.1953G>A                               | p.T651T             | rs7688609              | 100   | 99.8 | 99.7      | 100       |
| FLT3     | c.1310-3T>C                             | p.?                 | rs2491231              | 99.76 | 100  | nd        | 100       |
| HRAS     | c.81T>C                                 | p.H27H              | COSM249860             | 51.75 | 50.5 | nd        | 33.7      |
| KDR      | c.798+54G>A                             | p.?                 | rs7692791              | 48.00 | 23.7 | nd        | 34.00     |
| KIT      | c.68-13T>G                              | p.?                 | -                      |       |      | 19.5      |           |
| NOTCH1   | c.5019-85T>C                            | p.?                 | -                      |       |      | 5.04      |           |
| PDGFRA   | c.1701A>G                               | p.P567P             | rs1873778              | 100   | 100  | 100       | 100       |
| PIK3CA   | c.352+40A>G                             | p.?                 | rs3729674              |       |      | 13.89     |           |
| PIK3CA   | <b>c.1633G&gt;A</b>                     | <b>p.E545K</b>      | <b>COSM763</b>         |       |      | 82.9      |           |
| RET      | c.2307G>T                               | p.L769L             | rs1800861              | 100   | 100  | 64.0      | 100       |
| SMAD4    | c.1335A>G                               | p. R445R            | -                      |       |      | 100       |           |
| SMAD4    | c.1389A>G                               | p.A463A             | -                      |       |      | 100       |           |
| SMAD4    | c.1410T>C                               | p.P470P             | -                      |       |      | 100       |           |
| SMAD4    | c.594A>G                                | p.P198P             | -                      |       |      | 26.1      |           |
| SMAD4    | c.1332T>C                               | p.H444H             | -                      |       |      | 96.7      |           |
| SMAD4    | c.1353_1359<br>delGGCTACTin<br>sAGCCACG | p.AAT451_453AAT     | -                      |       |      | 100       |           |
| SMO      | c.1623G>A                               | p.T541T             | COSM1085436            |       |      | 100       |           |
| SMO      | c.1566G>A                               | p.L522L             | -                      |       |      | 100       |           |
| SMO      | c.1539G>C                               | p.P513P             | -                      |       |      | 95.5      |           |
| SMO      | c.1545T>C                               | p.L515L             | -                      |       |      | 99.2      |           |
| SMO      | c.1590_1591del<br>CGinsTT               | p.IA530_531IS       | -                      |       |      | 100       |           |
| STK11    | c.465-51T>C                             | p.?                 | rs2075606              | 52.24 | 53.3 | nd        | 55        |
| STK11    | c.75C>T                                 | p.F25F              | -                      |       |      | 5.2       |           |
| TP53     | c.215C>G                                | p.P72R              | COSM250061             | 99.40 | 97.8 | 98.0      | 100       |

| pt. #399 |                    |                     |                        |      |      |           |           |
|----------|--------------------|---------------------|------------------------|------|------|-----------|-----------|
| GENE     | Nucleotide variant | Amino acid mutation | COSMIC/dbSNP ID number | gDNA | FFPE | CTC M+/E- | CTC M-/E- |
| APC      | c.4479G>A          | p.T1493T            | COSM3760869            | 99.8 | 99.8 | 99.8      | 100       |
| CSF1R    | c.*1841TG>GA       | p.?                 | rs386693509            | 100  | 98.1 | 99.6      | 99.9      |
| EGFR     | c.2361G>A          | p.Q787Q             | COSM1451600            | 99.6 | 99.7 | 99.5      | 100       |
| FGFR3    | c.1953G>A          | p.T651T             | rs7688609              | 99.7 | 99.7 | 99.8      | 99.8      |
| FLT3     | c.1310-3T>C        | p.?                 | rs2491231              | 100  | 99.8 | 99.9      | 99.9      |
| KDR      | c.798+54G>A        | p.?                 | rs7692791              | 99.7 | 99.6 | 99.9      | 100       |
| MET      | c.3029C>T          | p.T1010I            | COSM707                | 49.9 | 49.3 | 54.7      | 52.0      |
| MPL      | c.1565+27G>A       | p.?                 | -                      |      |      |           | 5.35      |
| PDGFRA   | c.1701A>G          | p.P567P             | rs1873778              | 99.9 | 99.6 | 99.9      | 99.9      |
| PDGFRA   | c.2472C>T          | p.V824V             | COSM22413              | 47.3 | 42.4 | 50.9      | 47.3      |
| RET      | c.2307G>T          | p.L769L             | rs1800861              | 52.5 | 44.2 | 52.3      | 44.9      |
| STK11    | c.465-51T>C        | p.?                 | rs2075606              | 52.2 | 45.2 | 60.5      | 42.6      |
| TP53     | <b>c.711G&gt;A</b> | <b>p.M237I</b>      | <b>COSM10834</b>       |      | 5.89 |           |           |

| pt. #407 |                     |                     |                        |       |       |           |           |           |
|----------|---------------------|---------------------|------------------------|-------|-------|-----------|-----------|-----------|
| GENE     | Nucleotide variant  | Amino acid mutation | COSMIC/dbSNP ID number | gDNA  | FFPE  | CTC M+/E+ | CTC M+/E- | CTC M-/E- |
| ALK      | c.3541C>T           | p.R181C             | rs56315533             |       |       |           | 6.65      |           |
| APC      | c.4479G>A           | p.T1493T            | COSM3760869            |       |       | 20.37     |           | 17.56     |
| CSF1R    | c.*1841TG>GA        | p.?                 | rs386693509            | 96.67 | 96.61 | 98.25     | 99.00     | 100       |
| EGFR     | c.2361G>A           | p.Q787Q             | COSM1451600            | 100   | 99.58 | 100       | 99.00     | 100       |
| EGFR     | c.1750C>A           | p.H584N             | -                      |       |       |           | 6.06      |           |
| EGFR     | c.356T>C            | p.L119S             | -                      |       |       |           | 6.50      |           |
| ERBB4    | c.1786G>A           | p.G596S             | -                      |       |       |           | 8.25      |           |
| EZH2     | c.1934A>G           | p.E645G             | -                      |       |       | 7.00      |           |           |
| FBXW7    | c.1412A>G           | p.E471G             | COSM305935             |       |       | 7.74      |           |           |
| FGFR3    | c.1953G>A           | p.T651T             | rs7688609              | 99.48 | 100   | 99.66     | 99.86     | 99.88     |
| FLT3     | c.2053+23A>G        | p.?                 | rs75580865             | 54.81 | 64.65 | 59.23     | 41.65     | 74.15     |
| FLT3     | c.1310-3T>C         | p.?                 | rs2491231              | 44.48 | 55.99 | 52.20     | 44.15     | 58.35     |
| FLT3     | c.2531T>C           | p.V844A             | -                      |       |       |           | 5.26      |           |
| HRAS     | c.81T>C             | p.H27H              | COSM249860             | 44.86 | 53.70 | 36.96     | 48.66     | 52.23     |
| JAK3     | c.420+18G>A         | p.?                 | -                      |       |       | 8.01      |           |           |
| JAK3     | c.1737G>A           | p.V579V             | -                      |       |       |           | 6.90      |           |
| KDR      | c.798+54G>A         | p.?                 | rs7692791              | 37.68 | 38.00 | 29.17     | 37.31     | 50.00     |
| KDR      | c.3423C>A           | p.D1141E            | -                      |       |       |           | 9.65      |           |
| KDR      | c.4004A>G           | p.Q1335R            | -                      |       |       |           | 17.26     |           |
| KIT      | <b>c.1638A&gt;G</b> | <b>p.K546K</b>      | <b>COSM21983</b>       | 50.22 | 49.72 | 59.93     | 44.90     | 45.19     |
| KIT      | c.1540+8T>C         | p.?                 | -                      |       |       |           | 5.30      |           |
| KIT      | c.1994C>A           | p.P665H             | -                      |       |       |           | 5.35      |           |
| KRAS     | <b>c.172A&gt;G</b>  | <b>p.T58A</b>       | -                      |       |       |           | 8.20      |           |
| NRAS     | c.130G>A            | p.V44M              | -                      |       |       | 5.24      |           |           |
| NRAS     | c.192C>T            | p.Y64Y              | -                      |       |       | 5.47      |           |           |
| PDGFRA   | c.1701A>G           | p.P567P             | rs1873778              | 100   | 99.93 | 100       | 99.84     | 100       |
| PIK3CA   | <b>c.3140A&gt;T</b> | <b>p.H1047L</b>     | <b>COSM776</b>         |       |       | 5.97      |           |           |
| PTEN     | <b>c.1001A&gt;G</b> | <b>p.N334S</b>      | <b>COSM6948036</b>     |       |       |           | 6.26      |           |
| PTEN     | <b>c.511C&gt;T</b>  | <b>p.Gln171Ter</b>  | <b>COSM5149</b>        |       |       |           | 5.27      | nc        |
| PTPN11   | c.1551G>A           | p.A517A             | COSM6135785            |       |       |           | 6.30      |           |
| RET      | c.2307G>T           | p.L769L             | rs1800861              | 100   | 100   | 95.63     | 100       | 100       |
| RET      | c.2712C>G           | p.S904S             | rs1800836              | 48.11 | 47.09 | nc        | 46.74     | nc        |
| RET      | c.2285-8C>T         | p.?                 | -                      |       |       |           | 7.45      |           |
| SMAD4    | c.1408C>T           | p.P470S             | -                      |       |       | 5.85      |           |           |
| SMAD4    | c.955+58C>T         | p.?                 | rs948588               | 53.74 | 65.22 | 51.61     | 53.83     | 50.84     |
| SMAD4    | c.954T>C            | p.P318P             | rs773615487            | 52.79 | 65.56 | 49.25     | 54.15     | 43.58     |
| SMAD4    | c.1197C>T           | p.V399V             | -                      |       |       |           | 6.86      |           |
| SMARCB1  | c.573G>A            | p.L191L             | COSM6506621            |       |       |           | 7.60      |           |
| STK11    | c.465-51T>C         | p.?                 | rs2075606              | 45.31 | 69.69 | 41.94     | 57.26     | nc        |
| STK11    | c.91T>C             | p.S31P              | -                      |       |       | 6.63      |           |           |
| TP53     | <b>c.388C&gt;A</b>  | <b>p.L130I</b>      | <b>IARCTP53</b>        |       |       |           | 6.50      |           |
| TP53     | c.215C>G            | p.P72R              | COSM250061             | 45.75 | 67.35 | 50        | 60.90     | 50.0      |
| TP53     | c.376-35T>C         | p.?                 | -                      |       |       |           | 7.43      |           |
| TP53     | c.615T>C            | p.Y205Y             | rs786202222            |       |       | 6.4       |           |           |

| pt. #431 |                    |                     |                        |       |           |           |
|----------|--------------------|---------------------|------------------------|-------|-----------|-----------|
| GENE     | Nucleotide variant | Amino acid mutation | COSMIC/dbSNP ID number | gDNA  | CTC M+/E- | CTC M-/E- |
| APC      | c.4479G>A          | p.T1493T            | COSM3760869            | 100   | 99.95     | 80.86     |
| ATM      | c.5415G>A          | p.W1805*            | COSM4551820            |       |           | 5.85      |
| ATM      | c.8108A>G          | p.D2703G            | -                      |       |           | 5.95      |
| BRAF     | c.1800G>A          | p.V600V             | COSM249890             |       |           | 5.40      |
| CSF1R    | c.*1841TG>GA       | p.?                 | rs386693509            | 100   | 100       | 91.26     |
| EGFR     | c.2361G>A          | p.Q787Q             | COSM1451600            | 56.22 | 51.54     | 57.62     |
| EGFR     | c.2283+25G>A       | p.?                 | COSM24212              |       |           | 8.30      |
| EGFR     | c.2266A>G          | p.N756D             | -                      |       |           | 8.33      |
| ERBB2    | c.2621A>G          | p.Glu874Gly         | -                      |       |           | 5.73      |
| ERBB4    | c.421+58A>G        | p.?                 | rs839541               |       | 7.06      |           |
| FBXW7    | c.796A>G           | p.Lys266Glu         | -                      |       |           | 5.80      |
| FGFR3    | c.2115G>A          | p.K705K             | COSM6282664            |       |           | 5.06      |
| FGFR3    | c.1953G>A          | p.T651T             | rs7688609              | 100   | 99.86     | 99.52     |
| FLT3     | c.1310-3T>C        | p.?                 | rs2491231              | 50.00 | 49.30     | 59.60     |
| HRAS     | c.81T>C            | p.H27H              | COSM249860             | 43.22 | 55.26     | 58.5      |
| KDR      | c.798+54G>A        | p.?                 | rs7692791              | 37.60 | 39.03     | 39.20     |
| KIT      | c.1638A>G          | p.K546K             | COSM21983              |       |           | 14.90     |
| KIT      | c.2532T>C          | p.C844C             | -                      |       | 5.90      |           |
| PDGFRA   | c.1701A>G          | p.P567P             | rs1873778              | 99.69 | 100       | 99.85     |
| PIK3CA   | c.352+40A>G        | p.?                 | rs3729674              | 48.24 | 35.56     | 36.91     |
| PIK3CA   | c.2765T>A          | p.M922L             | -                      |       | 7.06      |           |
| PTEN     | c.989A>G           | p.K330R             | -                      |       |           | 5.05      |
| RET      | c.2307G>T          | p.L769L             | rs1800861              | 100   | 90.53     | 95.53     |
| RET      | c.2712C>G          | p.S904S             | rs1800836              |       |           | 30.37     |
| RET      | c.2691A>G          | p.R897R             | COSM3723341            |       |           | 5.74      |
| RET      | c.2289C>T          | p.N763N             | COSM918121             |       |           | 6.09      |
| SMAD4    | c.955+58C>T        | p.?                 | rs948588               | 51.33 | 48.60     | 44.76     |
| SMO      | c.669A>C           | p.T229T             | ExAC                   |       | 5.90      |           |
| SMO      | c.642C>G           | p.G214G             | -                      |       | 5.75      |           |
| SMO      | c.675T>C           | p.A225A             | -                      |       | 5.60      |           |
| SMO      | c.600A>C           | p.T200T             | -                      |       | 5.95      |           |
| SMO      | c.576G>A           | p.Q192Q             | -                      |       | 5.85      |           |
| SMO      | c.573C>T           | p.G191G             | -                      |       | 5.95      |           |
| STK11    | c.465-51T>C        | p.?                 | rs2075606              | 53.04 | 38.79     | 53.48     |
| STK11    | c.980A>G           | p.D327G             | rs864622638            |       |           | 5.15      |
| TP53     | c.215C>G           | p.P72R              | COSM250061             | 97.81 | 99.22     | 99.38     |



## pt. #454

| GENE   | Nucleotide variant | Amino acid mutation | COSMIC/dbSNP ID number | gDNA  | FFPE  | CTC M+/E- | CTC M-/E- |
|--------|--------------------|---------------------|------------------------|-------|-------|-----------|-----------|
| APC    | c.4479G>A          | p.T1493T            | COSM3760869            | 46.02 | 51.21 | 48.82     | 55.04     |
| CSF1R  | c.954G>A           | p.G318G             | -                      |       |       |           | 5.70      |
| CSF1R  | c.*1841TG>GA       | p.?                 | rs386693509            | 100   | 99.83 | 95.56     | 100       |
| EGFR   | c.2361G>A          | p.Q787Q             | COSM1451600            | 51.39 | 40.65 | 59.59     | 55.89     |
| FGFR3  | c.1953G>A          | p.T651T             | rs7688609              | 100   | 100   | 99.68     | 99.03     |
| FLT3   | c.1310-3T>C        | p.?                 | rs2491231              | 100   | 99.95 | 99.95     | 99.90     |
| IDH1   | c.315C>T           | p.G105G             | rs11554137             | 53.43 | 50.03 | 49.95     | 43.65     |
| KDR    | c.798+54G>A        | p.?                 | rs7692791              | 100   | 99.83 | 100       | 91.28     |
| PDGFRA | c.1701A>G          | p.P567P             | rs1873778              | 100   | 99.85 | 100       | 100       |
| PDGFRA | c.2472C>T          | p.V824V             | COSM22413              | 99.46 | 99.30 | 98.55     | 95.37     |
| RET    | c.2307G>T          | p.L769L             | rs1800861              | 99.49 | 100   | 100       | 99.85     |
| RET    | c.2712C>G          | p.S904S             | rs1800836              |       |       |           | 7.68      |
| STK11  | c.465-51T>C        | p.?                 | rs2075606              | 54.92 | 53.05 | 49.14     | 52.45     |
| TP53   | <b>c.388C&gt;A</b> | <b>p.L130I</b>      | <b>IARCTP53</b>        |       |       | 7.03      |           |
| TP53   | c.215C>G           | p.P72R              | COSM250061             | 99.20 | 97.78 | 99.09     | 99.11     |

| pt. #458 |                    |                     |                        |       |       |           |           |
|----------|--------------------|---------------------|------------------------|-------|-------|-----------|-----------|
| GENE     | Nucleotide variant | Amino acid mutation | COSMIC/dbSNP ID number | gDNA  | FFPE  | CTC M+/E- | CTC M-/E- |
| APC      | c.4479G>A          | p.T1493T            | COSM3760869            | 50.51 | 67.64 | 54,06     | 50.00     |
| CSF1R    | c.*1841TG>GA       | p.?                 | rs386693509            | 100   | 100   | 100       | 84.29     |
| EGFR     | c.2361G>A          | p.Q787Q             | COSM1451600            | 100   | 99.62 | 100       | nc        |
| FGFR3    | c.1953G>A          | p.T651T             | rs7688609              | 50.00 | 99.82 | 99.43     | 100       |
| FLT3     | c.1310-3T>C        | p.?                 | rs2491231              | 50.00 | 73.59 | 53.98     | 44.80     |
| HRAS     | c.81T>C            | p.H27H              | COSM249860             | 42.29 | 37.46 | 43.59     | 65.43     |
| KIT      | c.1638A>G          | p.K546K             | COSM21983              |       |       |           | 5.52      |
| PDGFRA   | c.1701A>G          | p.P567P             | rs1873778              | 100   | 99.38 | 99.74     | 100       |
| PIK3CA   | c.352+40A>G        | p.?                 | rs3729674              | 58.08 | 35.52 | 48.41     | 35.71     |
| RET      | c.2307G>T          | p.L769L             | rs1800861              | 49.78 | 48.00 | 45.41     | 55.74     |
| TP53     | c.215C>G           | p.P72R              | COSM250061             | 98.39 | 97.52 | 97.86     | nc        |
| TP53     | c.817C>T           | p.R273C             | rs121913343            |       | 40.86 |           |           |

| pt. #471 |                     |                     |                        |       |           |           |           |
|----------|---------------------|---------------------|------------------------|-------|-----------|-----------|-----------|
| GENE     | Nucleotide variant  | Amino acid mutation | COSMIC/dbSNP ID number | gDNA  | CTC M+/E+ | CTC M+/E- | CTC M-/E- |
| ALK      | c.3559C>T           | p.S1186S            | -                      |       | 20.59     |           |           |
| APC      | c.4479G>A           | p.T1493T            | COSM3760869            | 49.21 | 50.46     | 44.00     | 50.75     |
| ATM      | c.1065+4C>T         | p.?                 | -                      |       | 6.72      |           |           |
| ATM      | c.5226C>T           | p.A1742A            | rs750881004            |       | 10.57     |           |           |
| CDKN2A   | <b>c.241C&gt;T</b>  | <b>p.P81S</b>       | <b>COSM48299</b>       |       | 5.26      |           |           |
| CSF1R    | c.941C>T            | p.T314I             | COSM4513528            |       |           | 6.95      |           |
| CSF1R    | c.*1841TG>GA        | p.?                 | rs386693509            | 100   | 100       | 100       | 99.12     |
| CTNNB1   | <b>c.136C&gt;T</b>  | <b>p.L46L</b>       | <b>COSM5988491</b>     |       | 13.33     |           |           |
| EGFR     | c.2361G>A           | p.Q787Q             | COSM1451600            | 45.06 | 60.21     | 44.58     | 47.62     |
| ERBB4    | c.421+58A>G         | p.?                 | rs839541               | 100   | 99.30     | 100       | 91.86     |
| ERBB4    | c.2759C>T           | p.P920L             | -                      |       | 10.56     |           |           |
| FGFR1    | c.844T>C            | p.S282P             | -                      |       |           | 7.40      |           |
| FGFR3    | c.1953G>A           | p.T651T             | rs7688609              | 100   | 100       | 100       | 100       |
| FGFR3    | c.1959+22G>A        | p.?                 | rs3135898              | 62.70 | 48.35     | 45.96     | 51.61     |
| FGFR3    | c.1959+21C>T        | p.?                 | -                      | 37.00 | 36.81     | 37.27     | 35.26     |
| FGFR3    | c.740-8C>T          | p.?                 | rs886038257            |       | 13.25     |           |           |
| FLT3     | c.1310-3T>C         | p.?                 | rs2491231              | 99.79 | 99.91     | 99.95     | 84.82     |
| HNF1A    | c.795C>T            | p.Y265Y             | -                      |       | 7.99      |           |           |
| HRAS     | c.81T>C             | p.H27H              | COSM249860             | 50.96 | 45.59     | 56.09     | 41.35     |
| KDR      | c.798+54G>A         | p.?                 | rs7692791              | 47.00 | 35.00     | 21.35     | 32.23     |
| KDR      | c.3849-16G>A        | p.?                 | -                      |       |           |           | 5.60      |
| KDR      | <b>c.2959G&gt;T</b> | <b>p.E987Ter</b>    | -                      |       | 5.13      |           |           |
| KIT      | <b>c.1621A&gt;C</b> | <b>p.M541L</b>      | <b>COSM28026</b>       | 48.22 | 63.31     | 37.81     | 43.87     |
| KIT      | c.1899A>G           | p.E633E             | -                      |       | 10.44     |           |           |
| MPL      | c.1549T>C           | p.F517L             | -                      |       |           | 8.91      |           |
| NOTCH1   | c.5020T>C           | p.S1674P            | COSM36230              |       |           |           | 5.63      |
| NPM1     | c.847-5T>C          | p.?                 | rs191111314            | 50.37 | 50.00     | 44.21     | 48.11     |
| PDGFRA   | c.1701A>G           | p.P567P             | rs1873778              | 100   | 100       | 100       | 99.72     |
| PIK3CA   | c.1173A>G           | p.I391M             | rs2230461              | 52.71 | 47.22     | 53.05     | 51.29     |
| PIK3CA   | c.352+40A>G         | p.?                 | rs3729674              | 48.69 | 62.38     | 55.56     | 48.88     |
| PTEN     | <b>c.794T&gt;C</b>  | <b>p.L265P</b>      | <b>rs1335033900</b>    |       |           |           | 5.54      |
| PTPN11   | c.1571C>T           | p.T524I             | -                      |       | 6.27      |           |           |
| PTPN11   | c.1527A>G           | p.A509A             | -                      |       | 6.34      |           |           |
| RB1      | c.969A>G            | p.E323E             | -                      |       | 7.11      |           |           |
| RET      | c.2307G>T           | p.L769L             | rs1800861              | 51.66 | 47.10     | 46.94     | 48.50     |
| RET      | c.2712C>G           | p.S904S             | rs1800836              | 47.80 | 44.59     | 59.49     | 37.57     |
| SMAD4    | c.955+58C>T         | p.?                 | rs948588               |       | 10.57     |           | 6.37      |
| SMARCB1  | c.1119-41G>A        | p.?                 | COSM1090               | 49.11 | 61.54     | 47.58     | 45.13     |
| STK11    | c.465-51T>C         | p.?                 | rs2075606              | 52.31 | 45.35     | 42.14     | 46.30     |
| TP53     | <b>c.388C&gt;A</b>  | <b>p.L130I</b>      | <b>IARCTP53</b>        |       | 5.73      |           | 5.41      |
| TP53     | c.215C>G            | p.P72R              | COSM250061             | 99.35 | 97.78     | 97.04     | 96.37     |
| TP53     | <b>c.713G&gt;A</b>  | <b>p.C238Y</b>      | <b>COSM11059</b>       |       | 6.65      |           |           |
